# Supplementary material
Source: PubMed Central journal article supplement (PMC6172655)
Supplement: NIHMS1506499-supplement-1.pdf [file NIHMS1506499-supplement-1.pdf]

**Supplementary Figure 1. Effect of Average Coverage on Sensitivity for Amplicon Data.** Average coverage and sensitivity were similar for all replicates with the amplicon-based targeted sequencing panels, with almost all replicates between 220x and 280x coverage. SNP sensitivity was higher than INDEL sensitivity.

---
